# Supplementary figures and images for: A kinase-independent function of AKT promotes cancer cell survival
Source: eLife journal article supplement (doi:10.7554/elife.03751), 2014-12-31

**Figure 1-Figure supplement 1.**

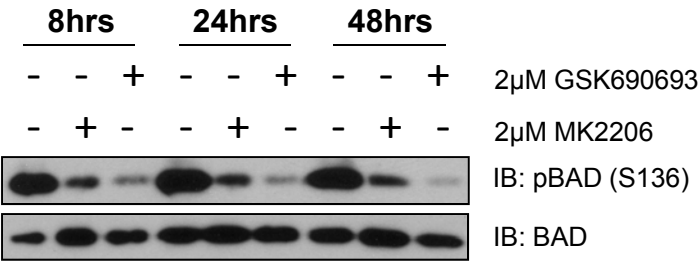

Supplement: supp [file elife-03751-supp-v1.zip]

Figure 1-Figure supplement 4.

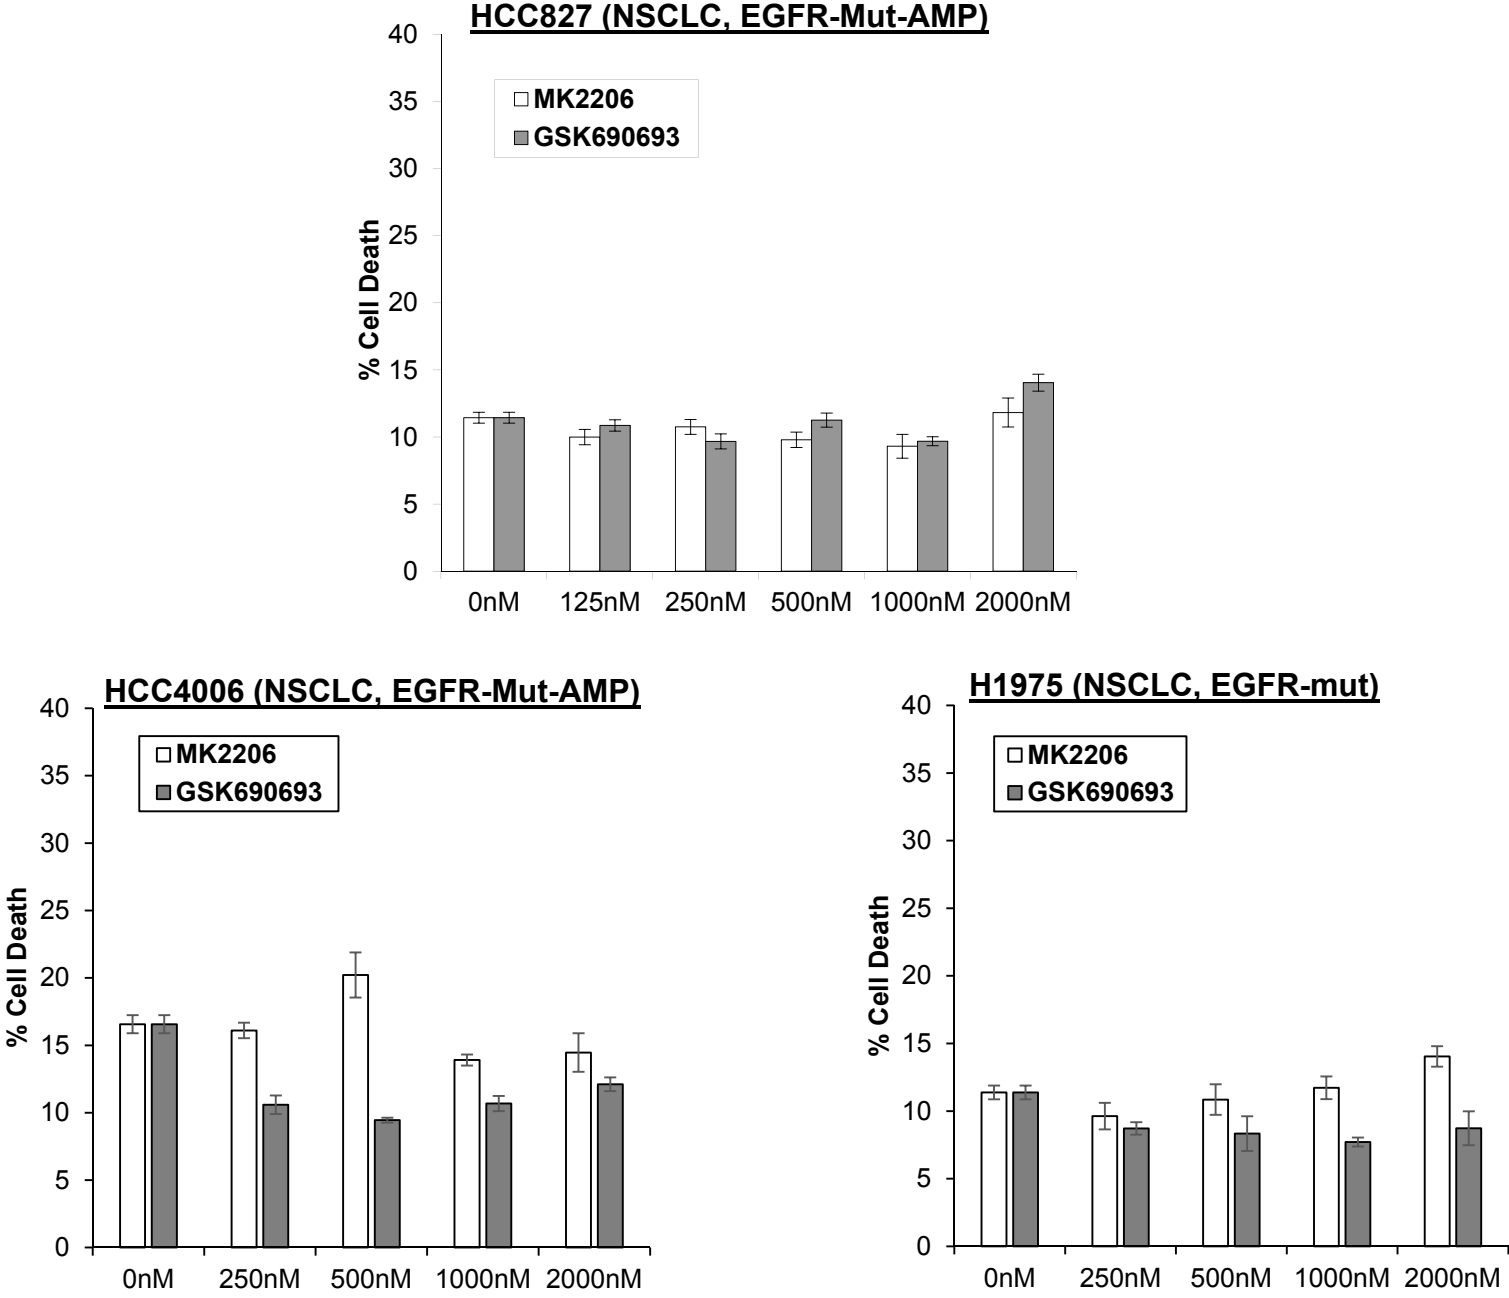

Supplement: supp [file elife-03751-supp-v1.zip]

Figure 1-Figure supplement 3.

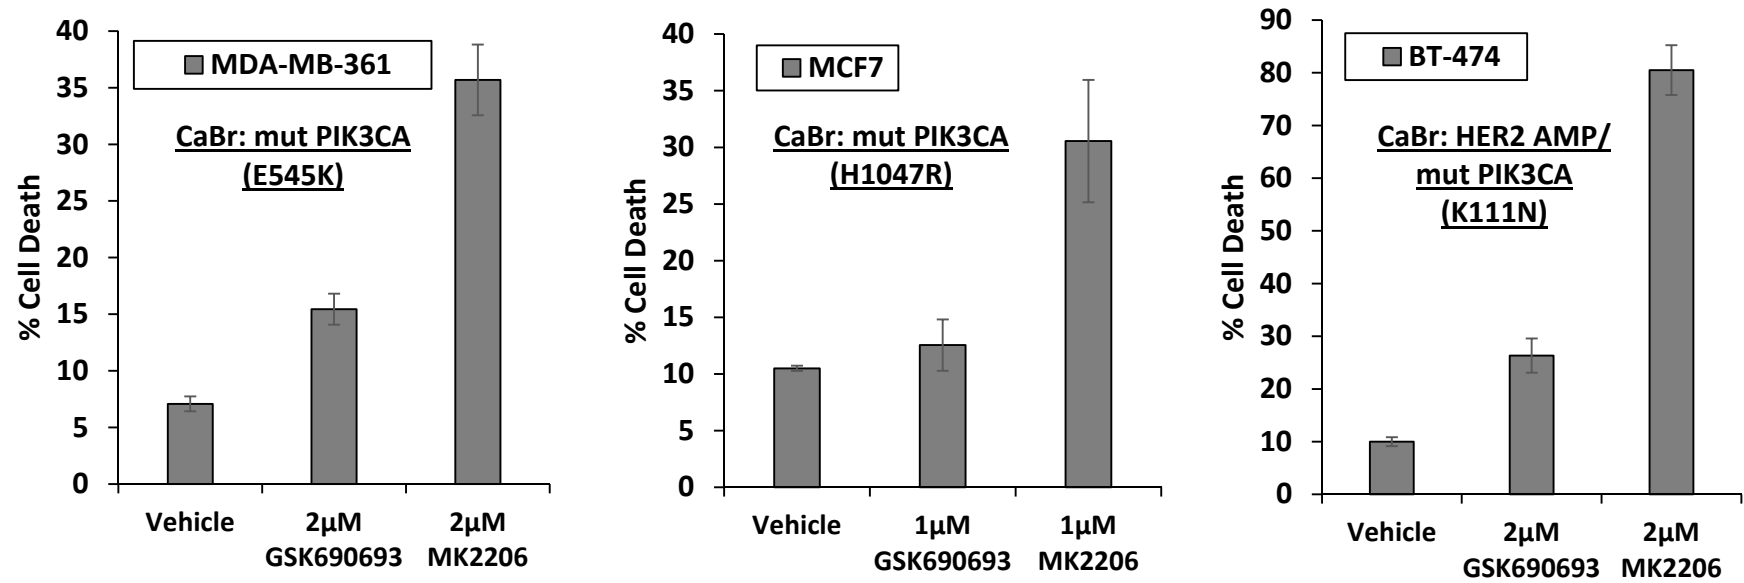

Supplement: supp [file elife-03751-supp-v1.zip]

Figure 1-Figure supplement 6.

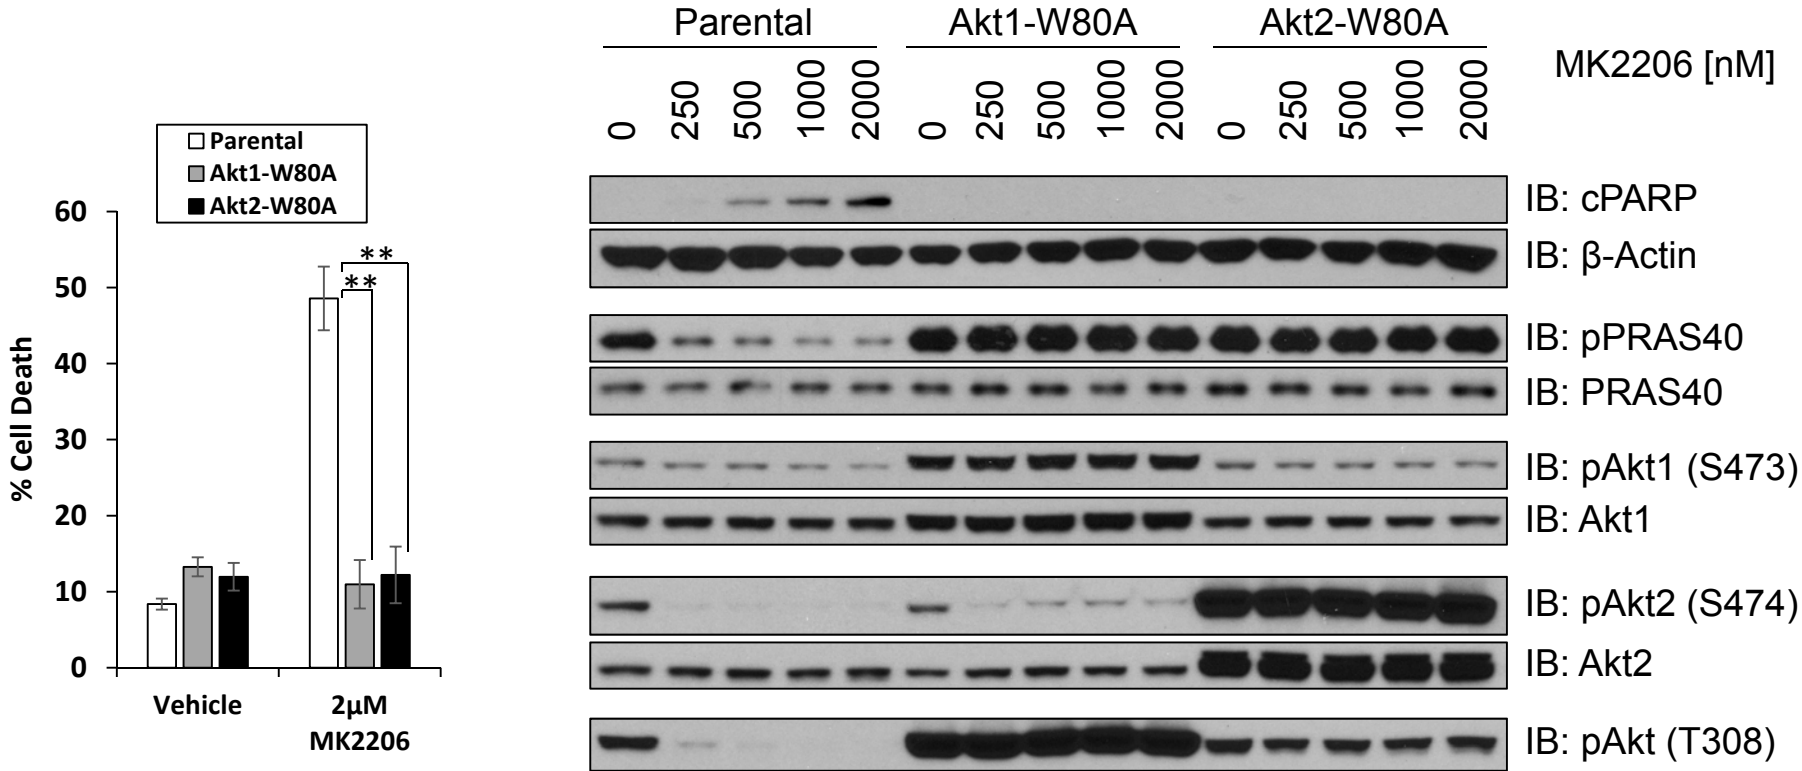

**MDA-MB-361**  
**mutPIK3CA Breast Ca**

Supplement: supp [file elife-03751-supp-v1.zip]

Figure 1-Figure supplement 2.

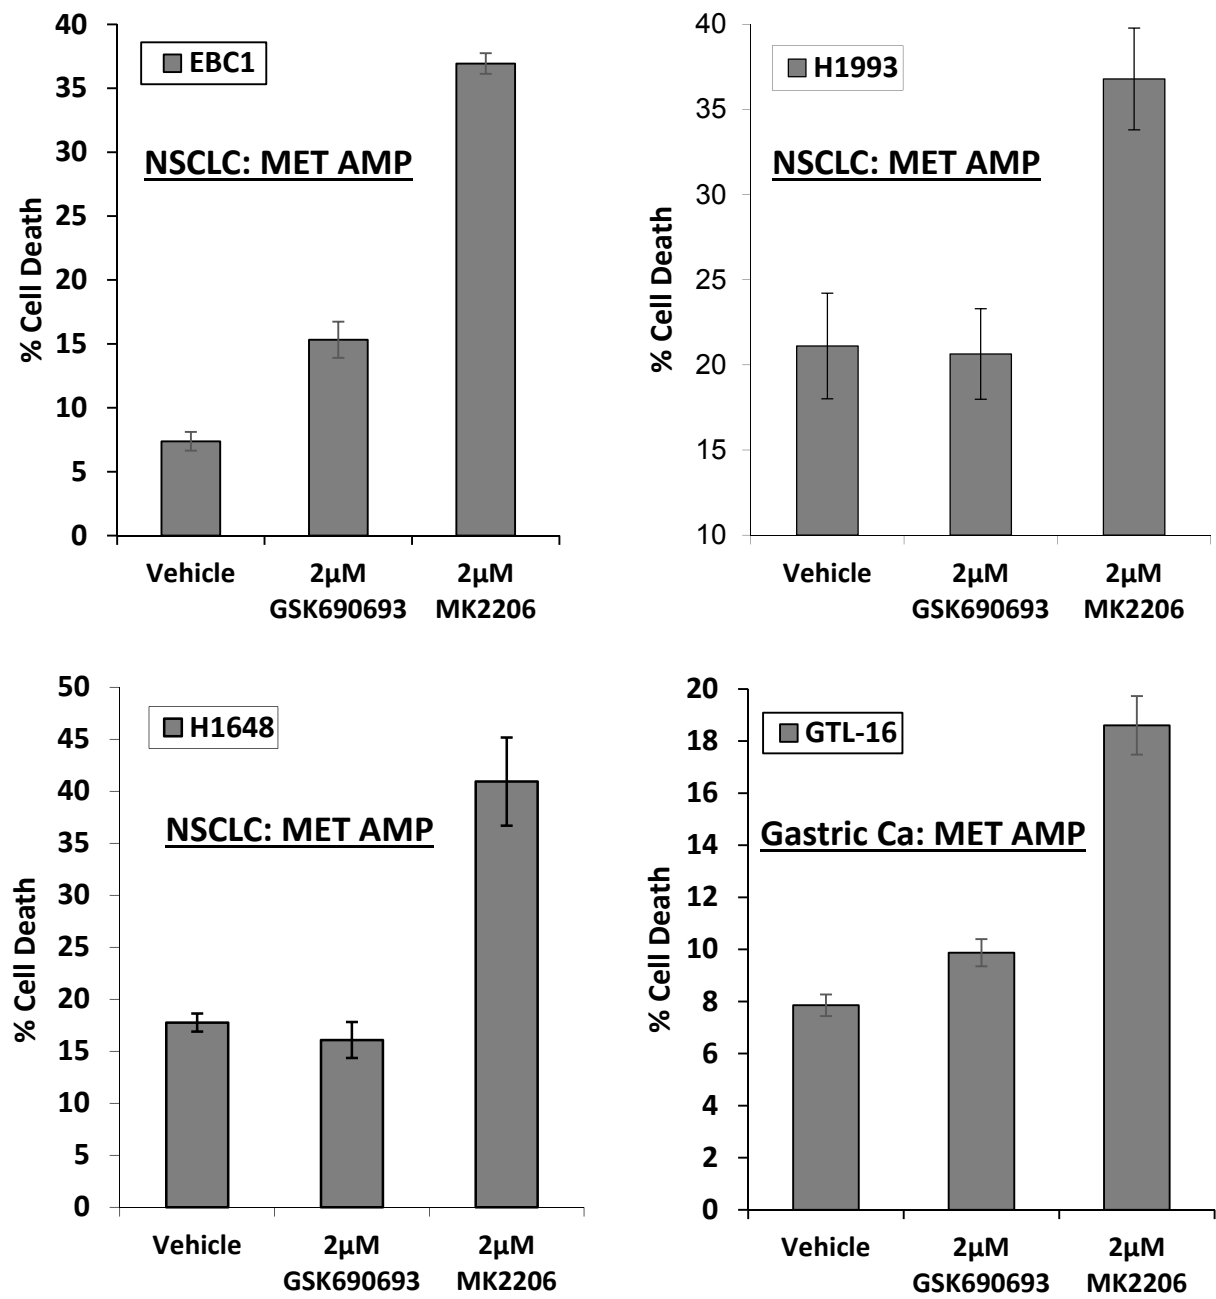

Supplement: supp [file elife-03751-supp-v1.zip]

Figure 1-Figure supplement 5.

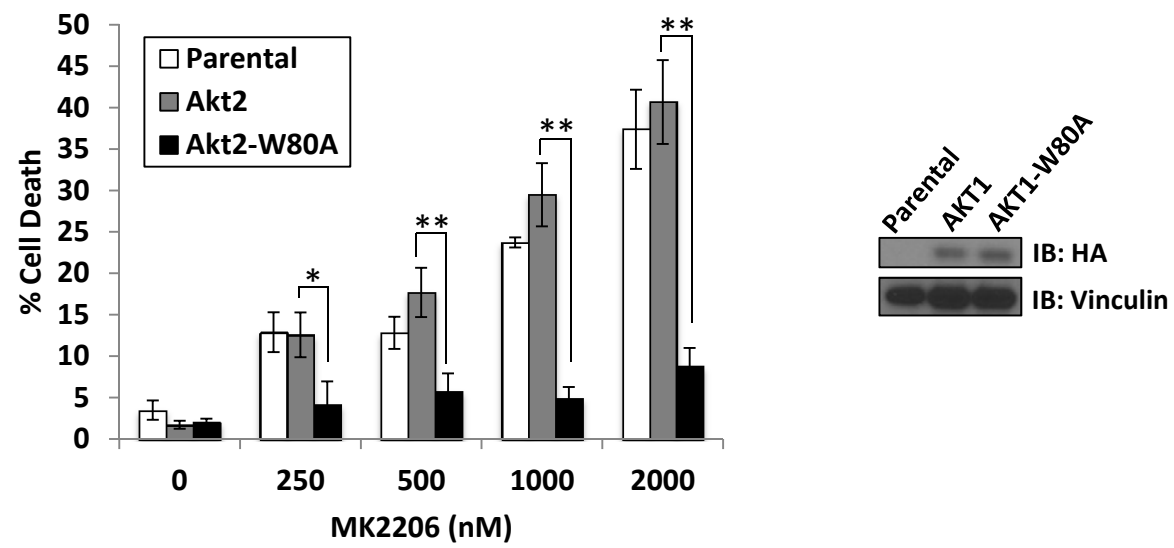

Supplement: supp [file elife-03751-supp-v1.zip]

Figure 3-Figure supplement 3.

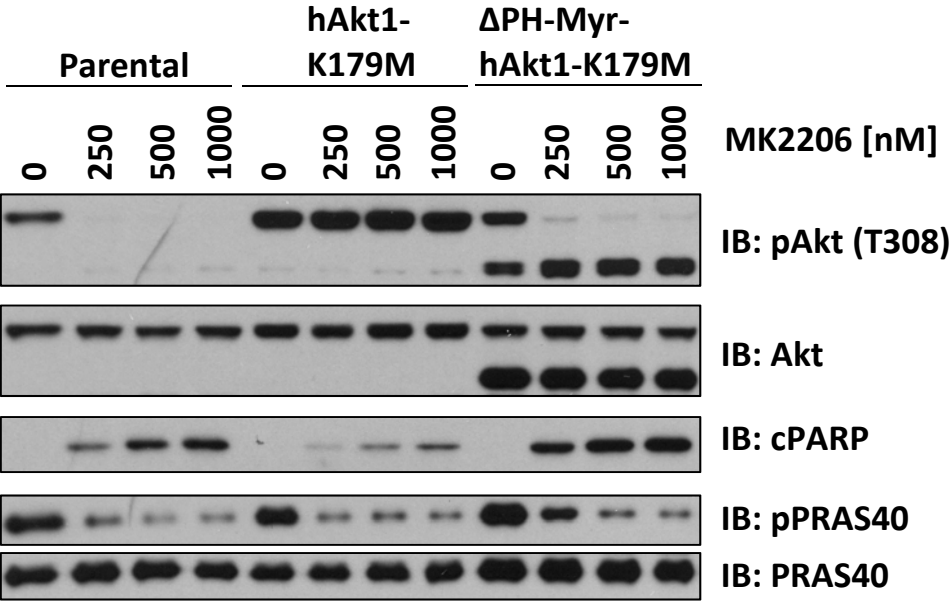

MDA-MB-361  
mutPIK3CA Breast Ca

Supplement: supp [file elife-03751-supp-v1.zip]

Figure 2-Figure supplement 1.

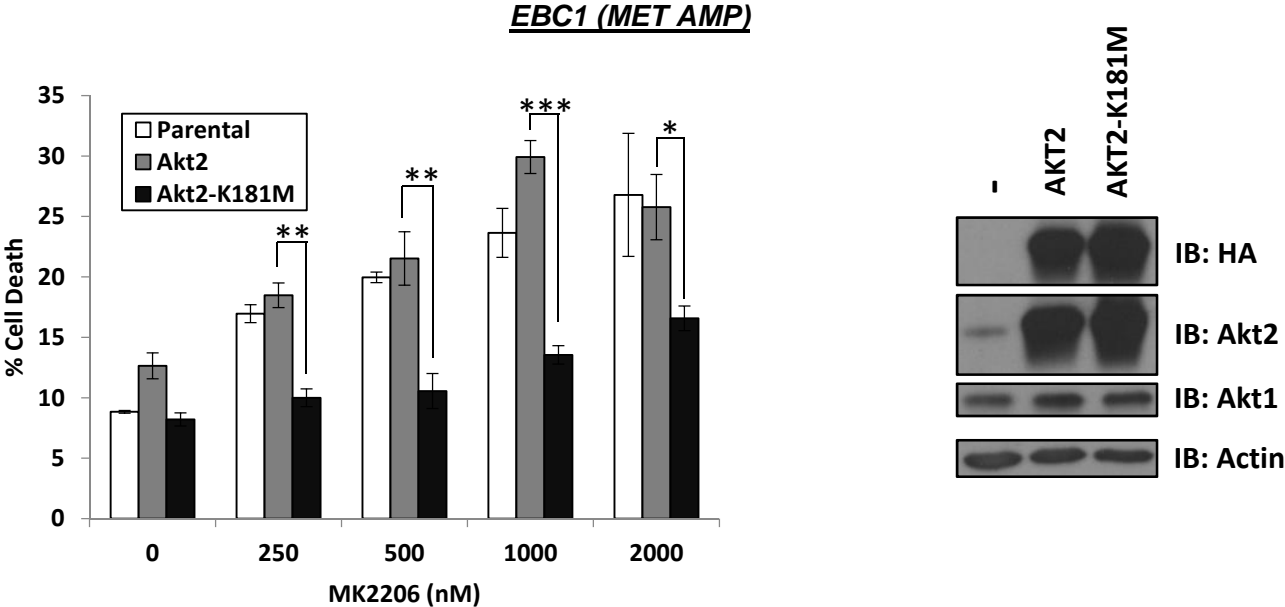

Supplement: supp [file elife-03751-supp-v1.zip]

Figure 1-Figure supplement 7.

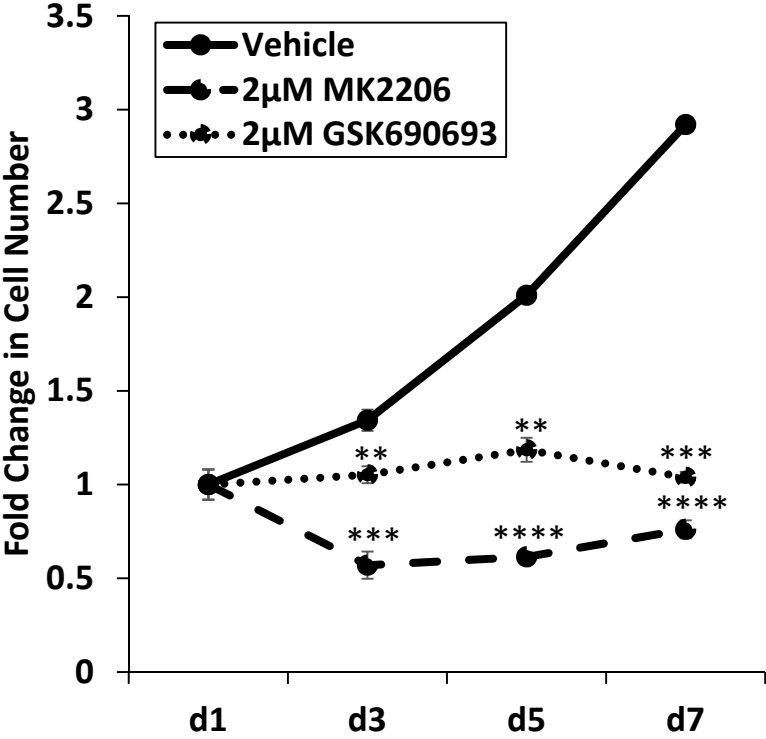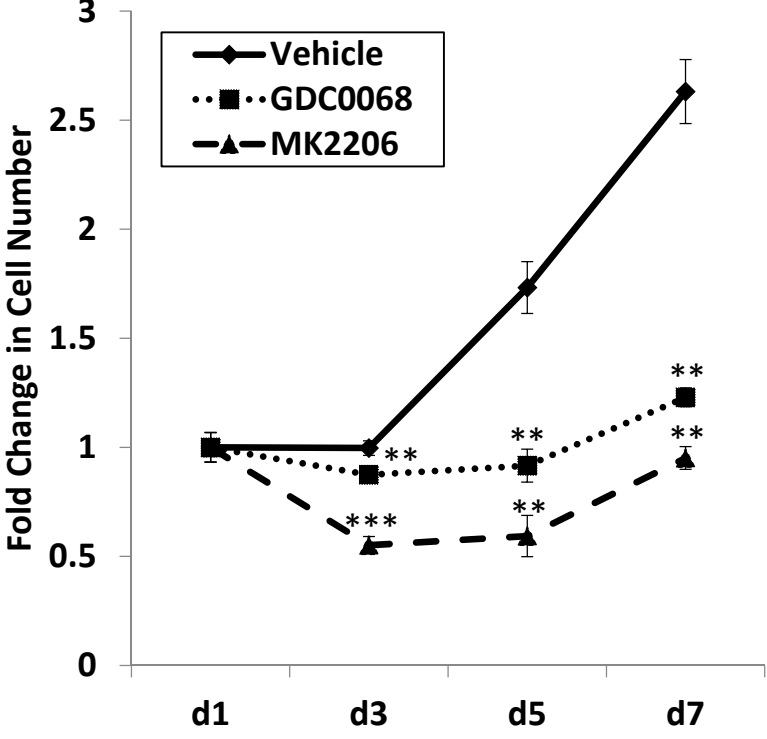

MDA-MB-361  
mutPIK3CA Breast Ca

Supplement: supp [file elife-03751-supp-v1.zip]

Figure 1-Figure supplement 8.

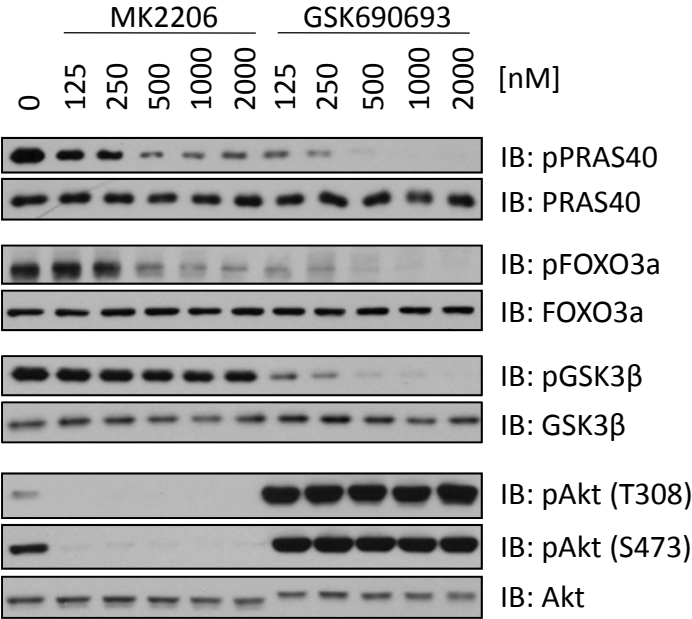

BT474

*HER2* AMP/  
mutPIK3CA (K111N)  
Breast Ca

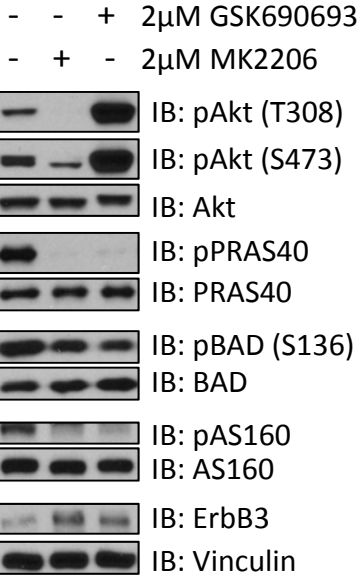

MDA-MB-361

mutPIK3CA (E545K)  
Breast Ca

Supplement: supp [file elife-03751-supp-v1.zip]

Figure 3-Figure supplement 2.

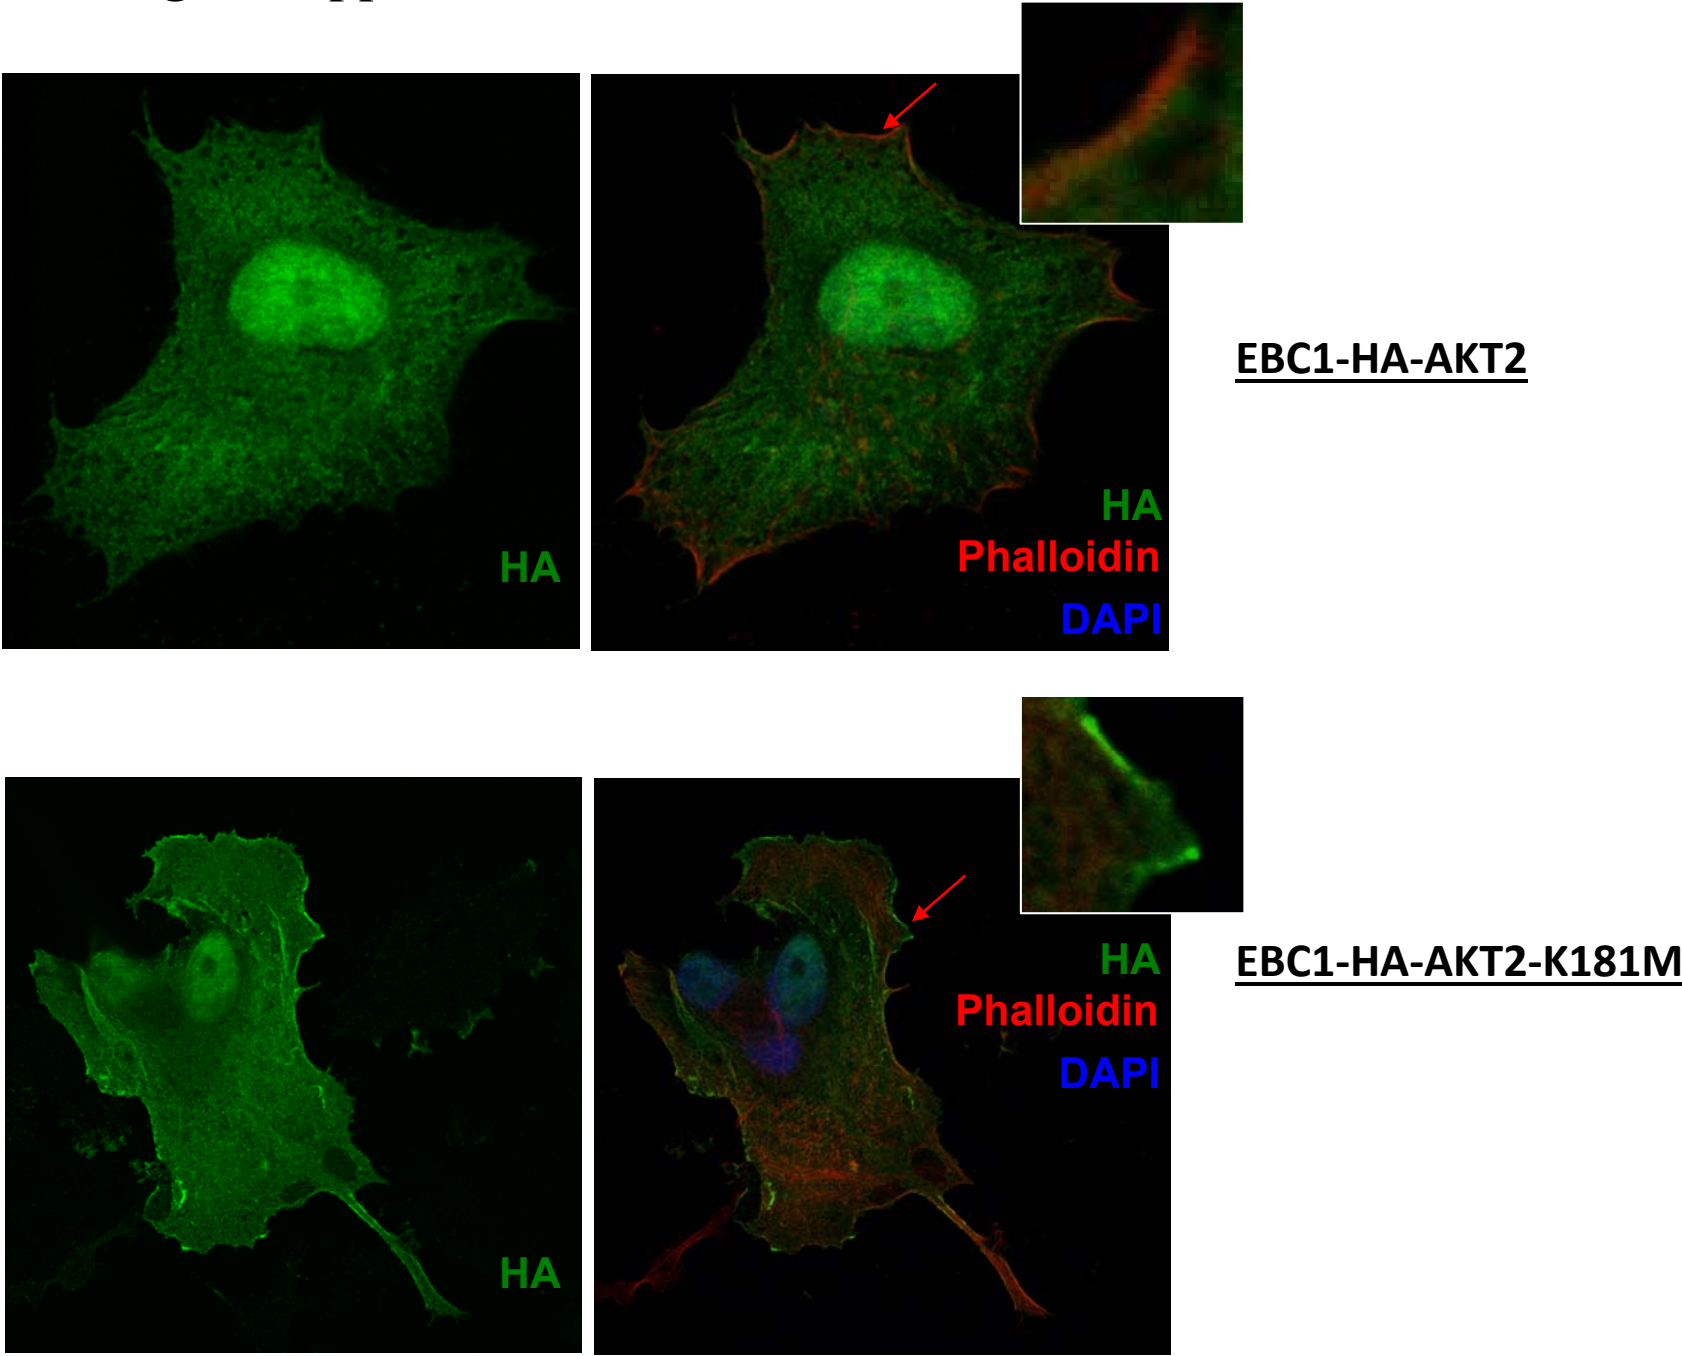

Supplement: supp [file elife-03751-supp-v1.zip]

Figure 3-Figure supplement 1.

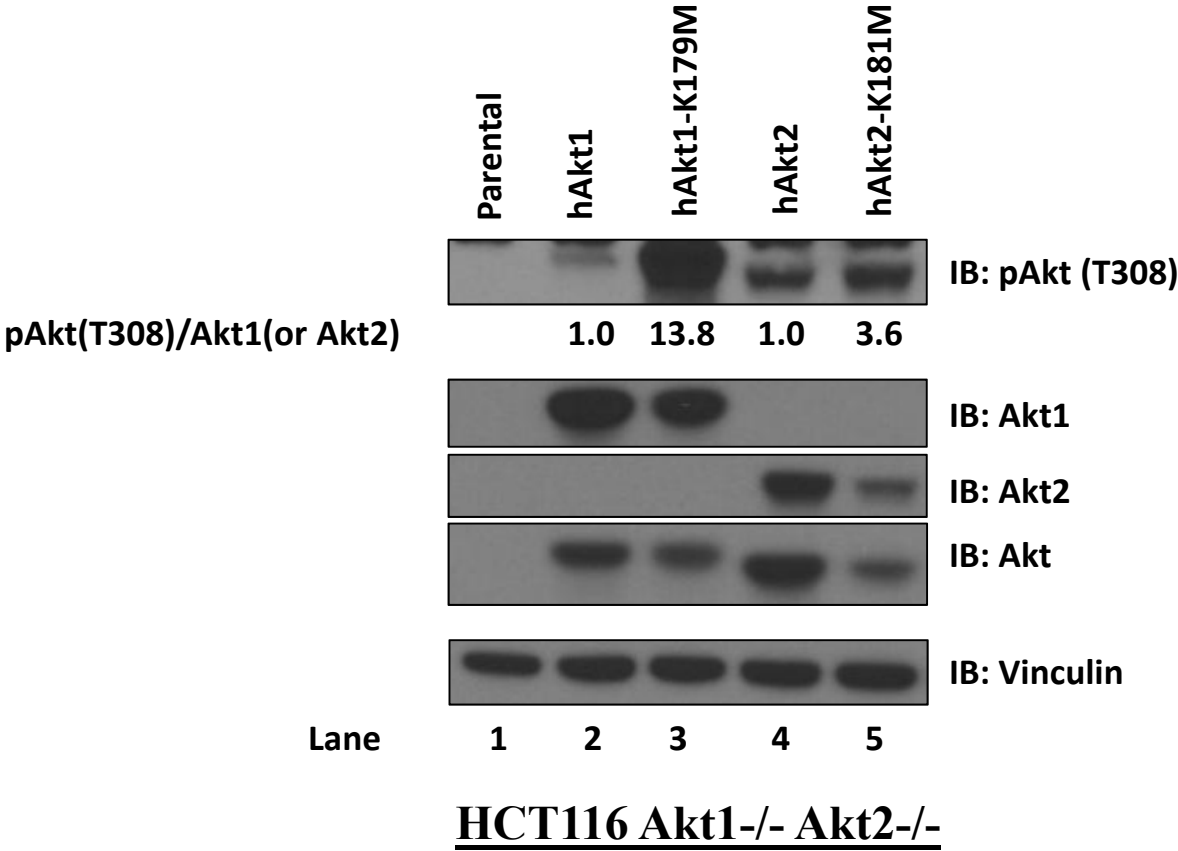

Supplement: supp [file elife-03751-supp-v1.zip]

Figure 3-Figure supplement 4.

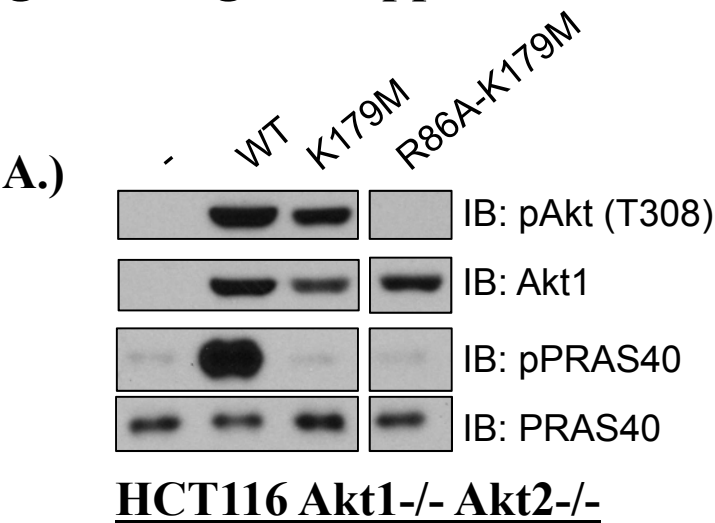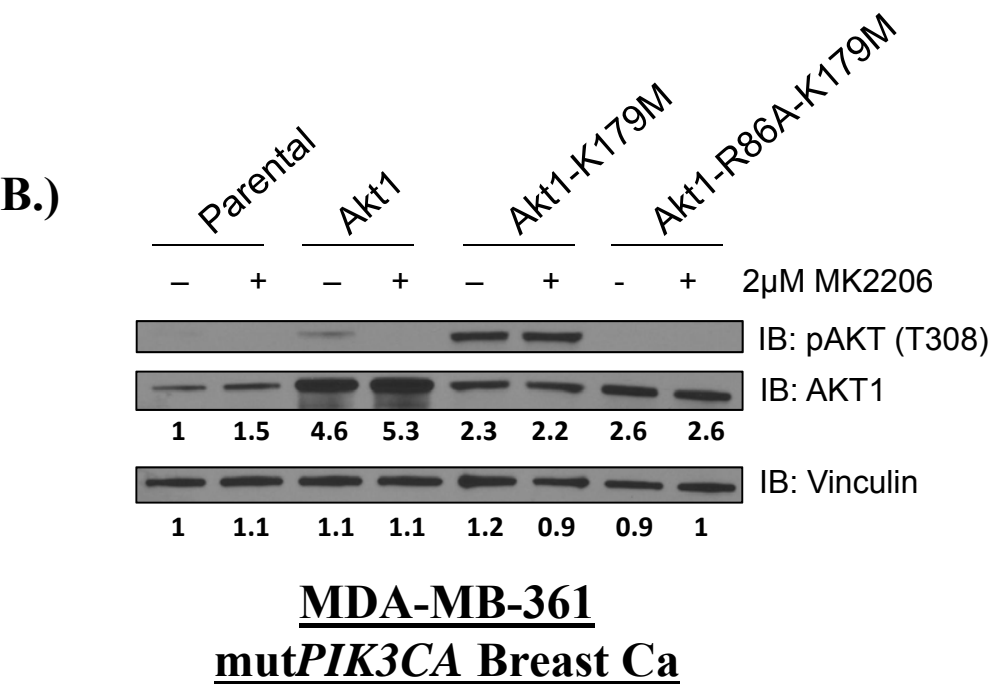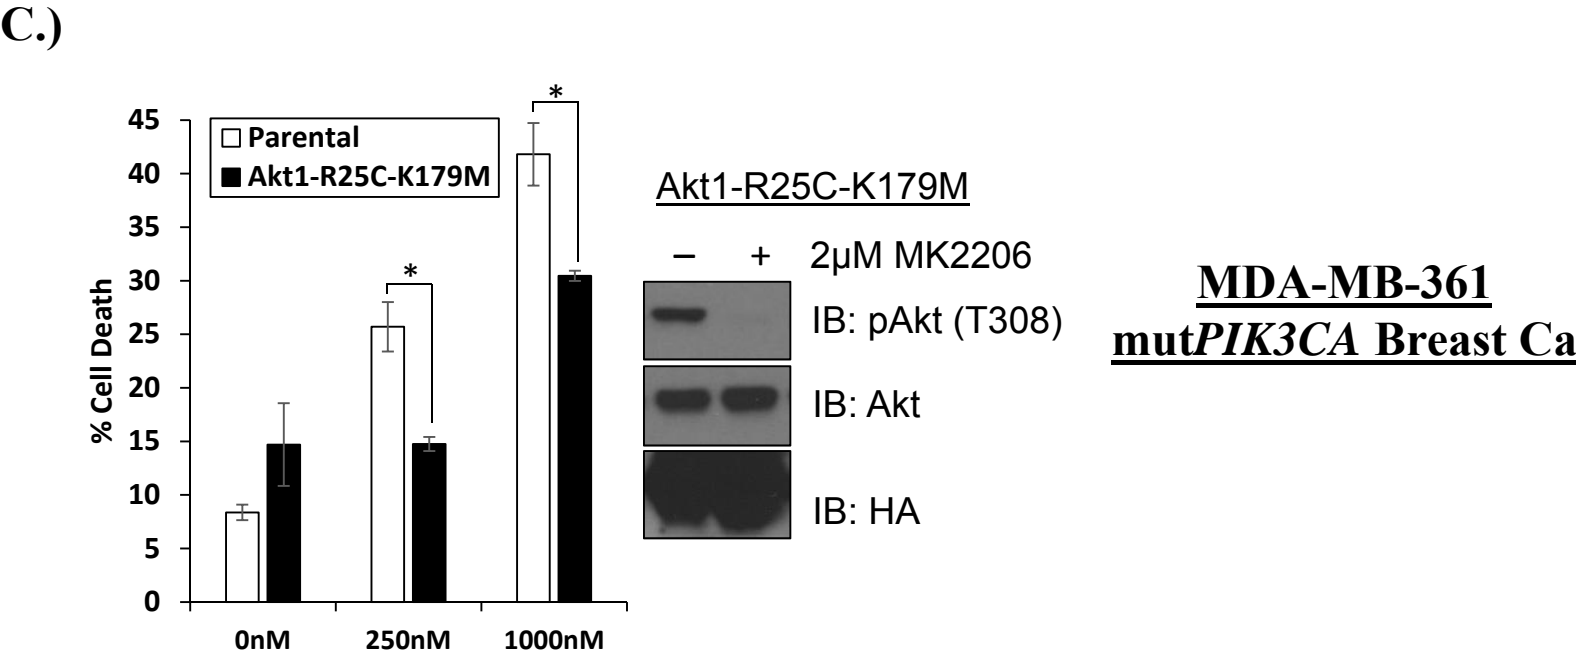

Supplement: supp [file elife-03751-supp-v1.zip]

Figure 1-Figure supplement 9.

*EBC1*  
*MET* AMP  
NSCLC

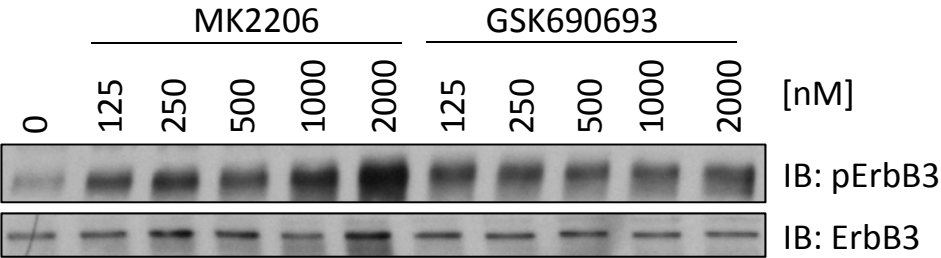

BT474  
*HER2* AMP /  
mutPIK3CA (K111N)  
Breast Ca

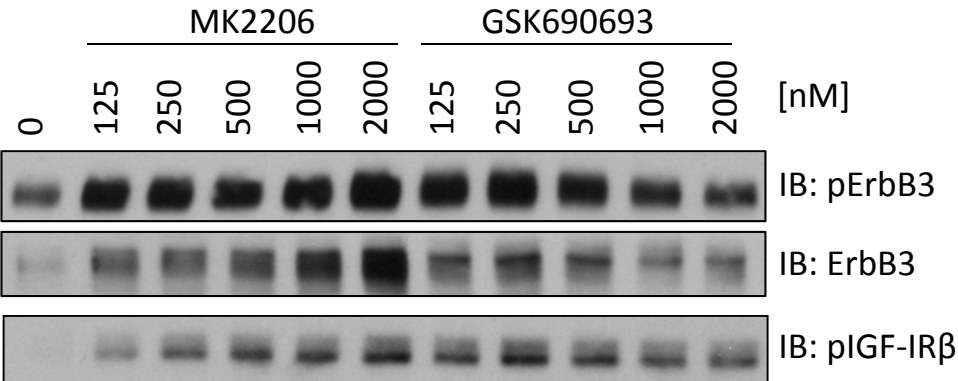

Supplement: supp [file elife-03751-supp-v1.zip]
